# Supplementary material for: Design of poly(N-isopropylacrylamide) coated MnO2 nanoparticles for thermally regulated catalytic decomposition of H2O2
Source: Royal Society of Chemistry journal article supplement (doi:10.1039/d4py00595c), 2024-01-01
Supplement: d4py00595c1.pdf [file d4py00595c1.pdf]

## Supporting Information

### Design of poly(*N*-isopropylacrylamide) coated MnO<sub>2</sub> nanoparticles for thermally regulated catalytic decomposition of H<sub>2</sub>O<sub>2</sub>

Anashwara Babu,<sup>#a</sup> Samarendra Maji,<sup>\*\*ab</sup> Gomathi Sivakumar,<sup>a</sup> and Richard Hoogenboom<sup>\*b</sup>

<sup>a</sup>Department of Chemistry, Faculty of Engineering and Technology, SRM Institute of Science and Technology (SRMIST), Kattankulathur, Tamil Nadu-603203, India. Email: [samarenr@srmist.edu.in](mailto:samarenr@srmist.edu.in)

<sup>b</sup>Supramolecular Chemistry Group, Department of Organic and Macromolecular Chemistry, Ghent University, Krijgslaan 281 S4, Ghent, Belgium E-mail: [richard.hoogenboom@ugent.be](mailto:richard.hoogenboom@ugent.be)

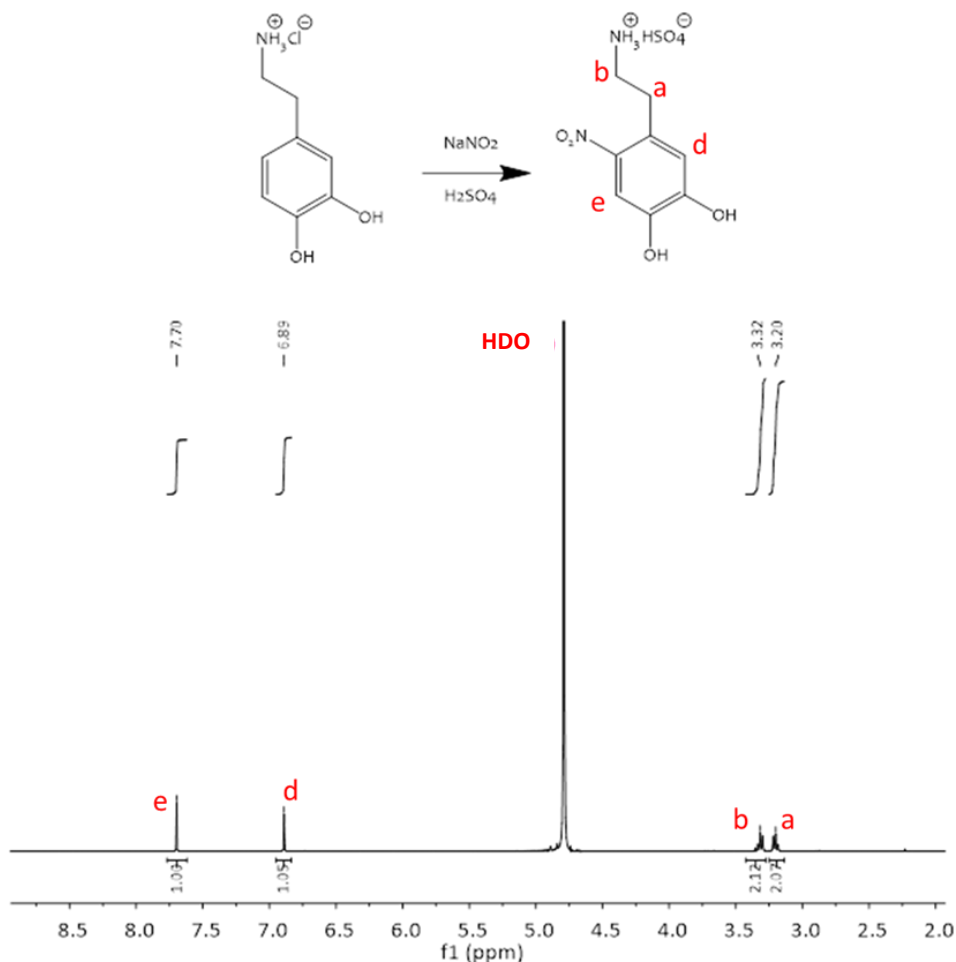

Figure S1. <sup>1</sup>H NMR spectrum of nitrodopamine hydrogensulfate measured in D<sub>2</sub>O.

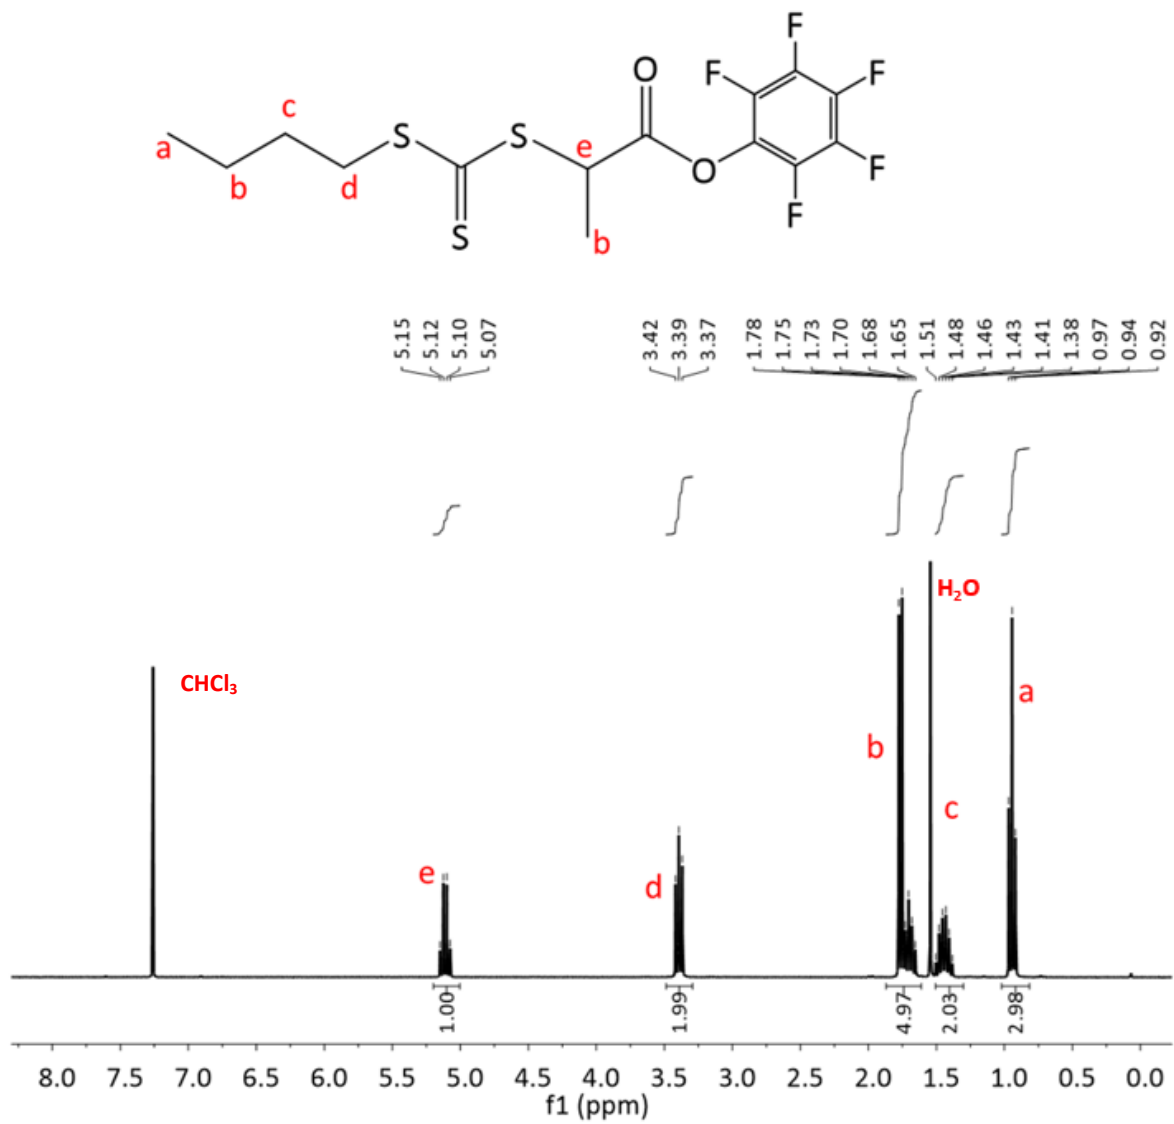

**Figure S2.**  $^1\text{H-NMR}$  spectrum of pentafluorophenol (PFP) containing CTA measured in  $\text{CDCl}_3$ .

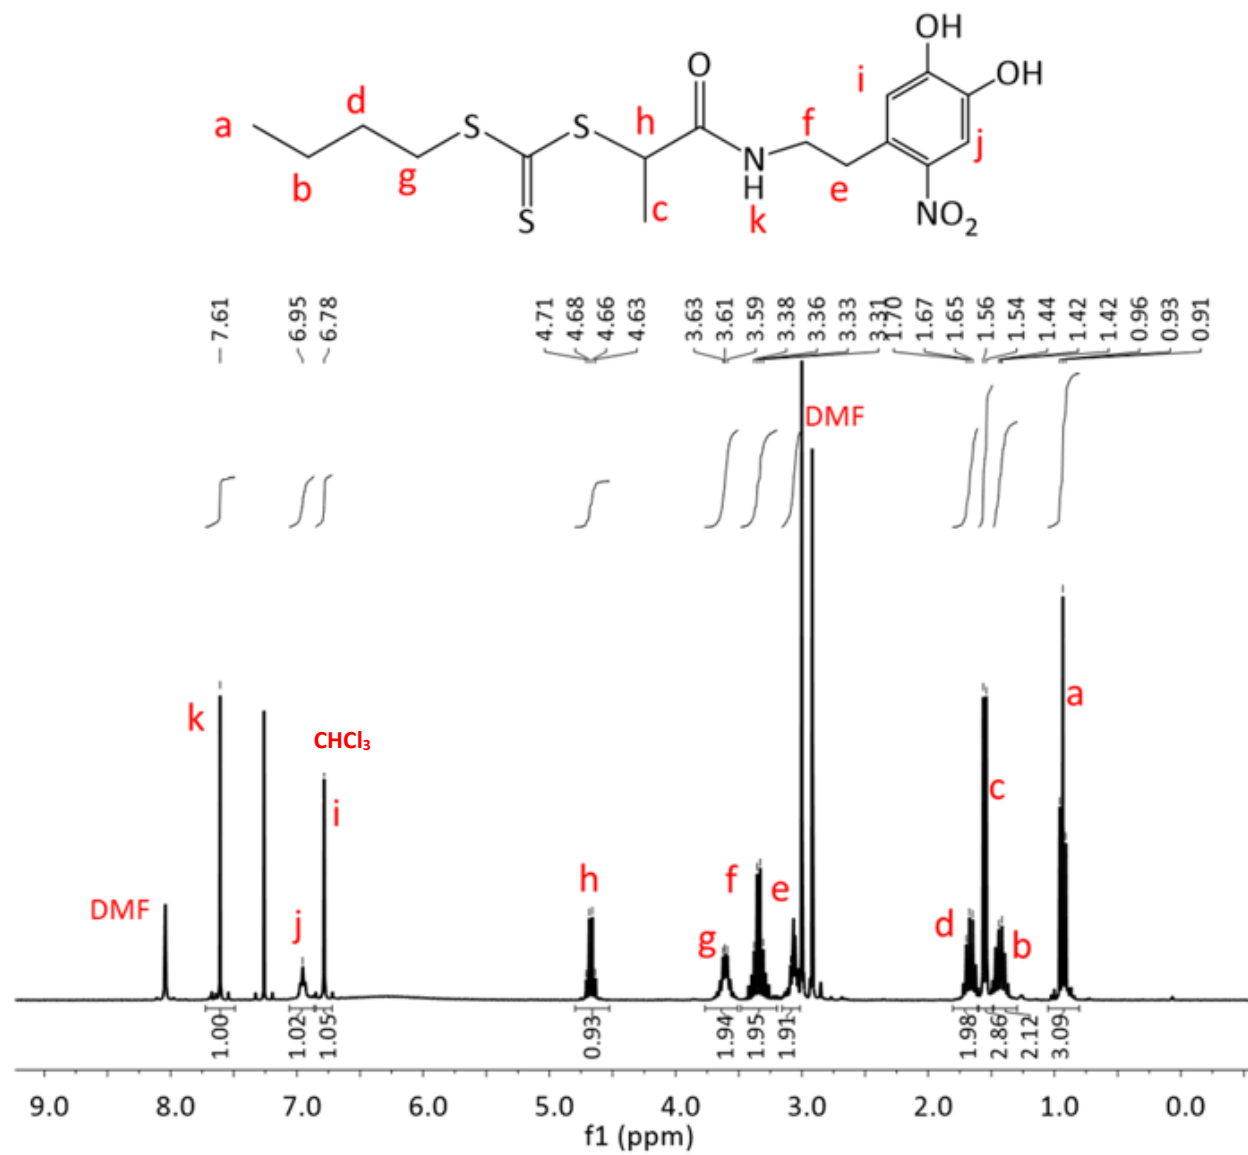

Figure S3. <sup>1</sup>H NMR spectrum of Nitro DOPA-CTA measured in CDCl<sub>3</sub>.

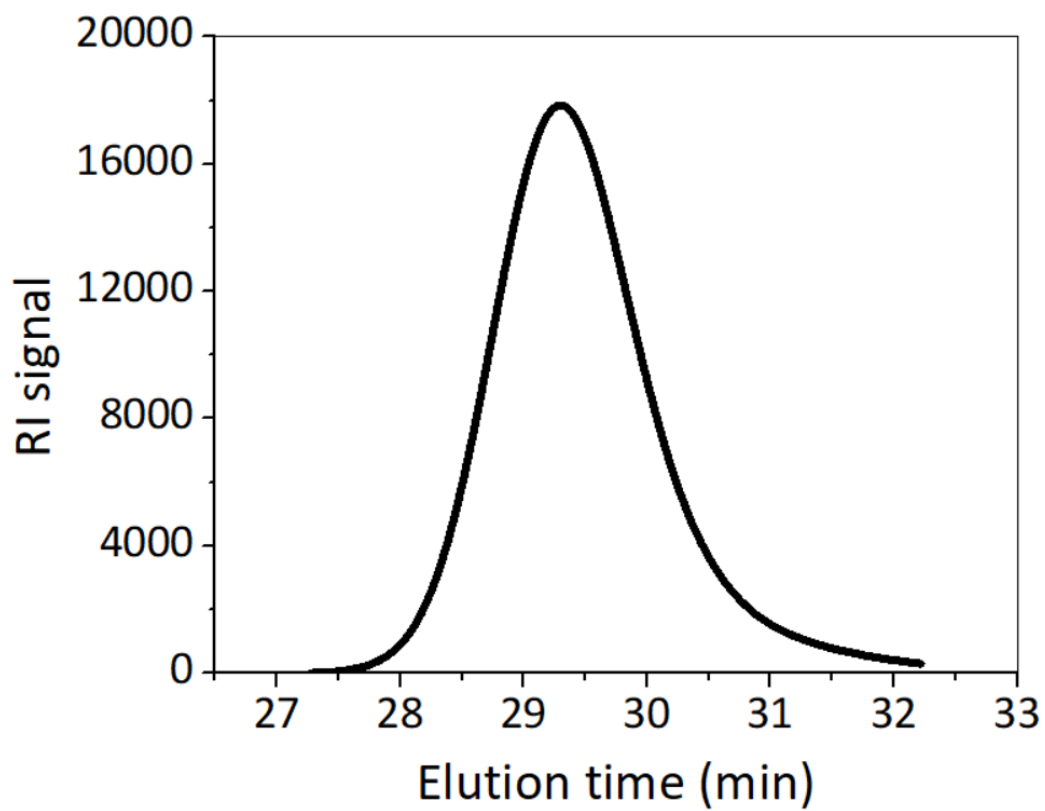

**Figure S4.** SEC RI trace of PNIPAM in DMAc containing 50 mM of LiCl at 50 °C.

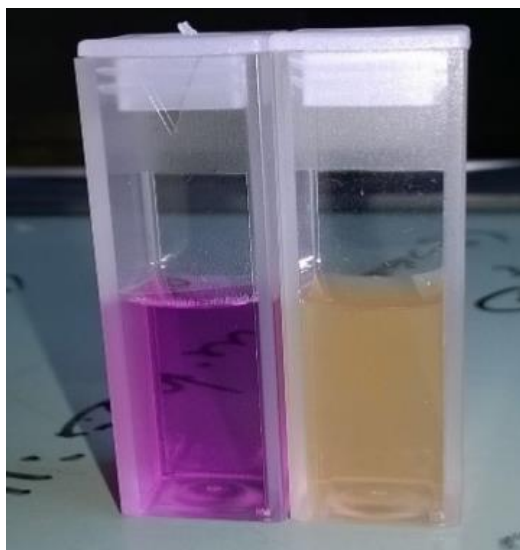

**Figure S5.** Photographs of plastic cuvettes containing KMnO<sub>4</sub> and MnO<sub>2</sub>NPs in water.

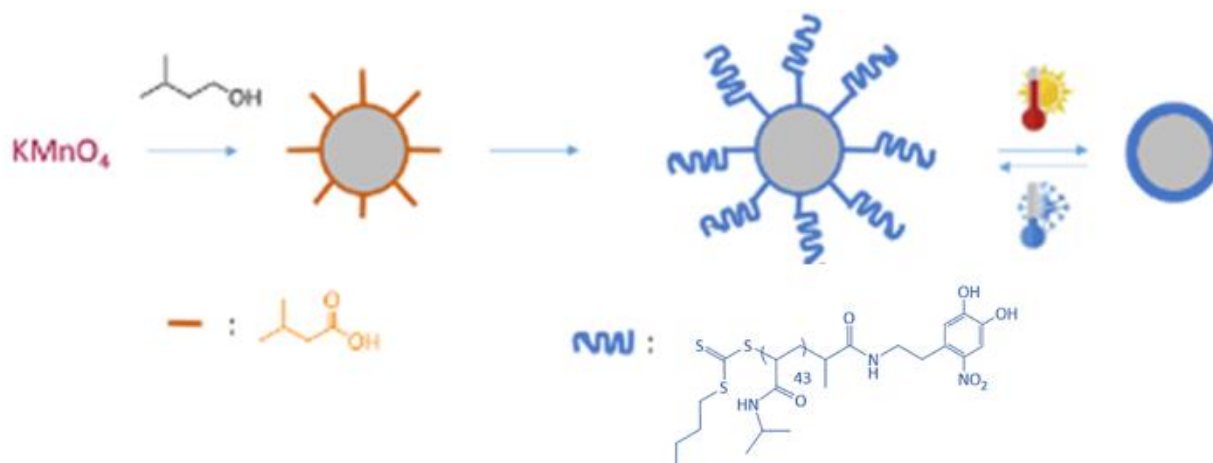

**Figure S6.** Schematic representation for the preparation of PNIPAM@MnO<sub>2</sub>NPs and thermoresponsive behavior.

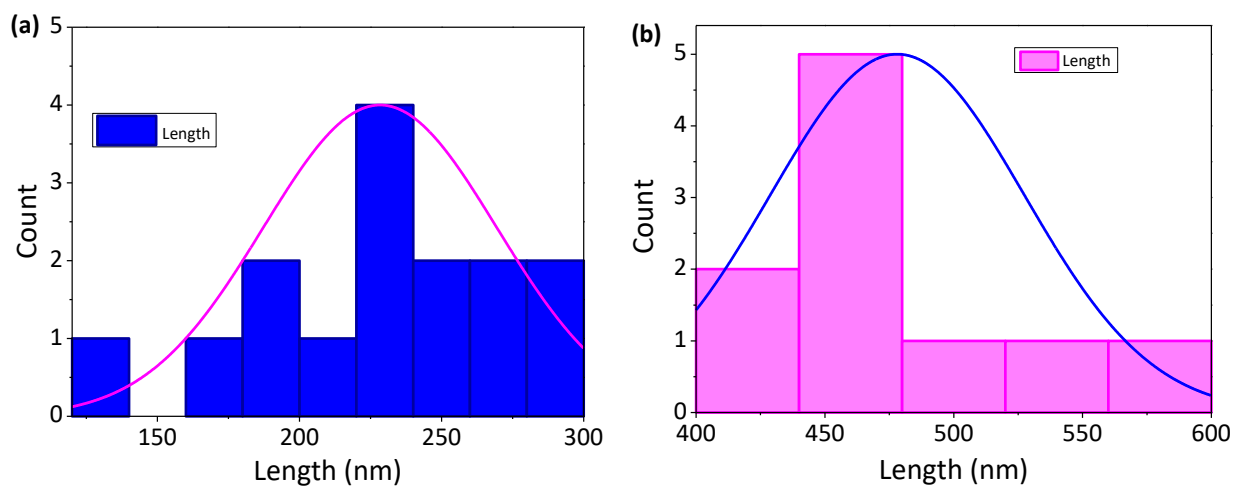

**Figure S7.** (a) Analysis of length of the MnO<sub>2</sub>NPs from SEM Images at 1  $\mu\text{m}$  scale, (b) Analysis of length of the PNIPAM modified MnO<sub>2</sub>NPs from SEM Images at 1  $\mu\text{m}$  scale.

**Table S1.** EDX data for MnO<sub>2</sub> NPs.

| <i>Element</i> | <i>Net Counts</i> | <i>Weight %</i> | <i>Atom %</i> | <i>Formula</i> |
|----------------|-------------------|-----------------|---------------|----------------|
| <b>C</b>       | 1360              | 16.78           | 26.65         | C              |
| <b>O</b>       | 4292              | 52.62           | 62.73         | O              |
| <b>Mn</b>      | 2835              | 30.60           | 10.62         | Mn             |
| <b>Total</b>   |                   | 100.00          | 100.00        |                |

**Table S2.** EDX data for PNIPAM@MnO<sub>2</sub> NPs.

| <i>Element</i> | <i>Net Counts</i> | <i>Weight %</i> | <i>Atom %</i> | <i>Formula</i> |
|----------------|-------------------|-----------------|---------------|----------------|
| <b>C</b>       | 2945              | 31.32           | 37.51         | C              |
| <b>N</b>       | 372               | 22.57           | 23.18         | N              |
| <b>O</b>       | 1002              | 42.55           | 38.26         | O              |
| <b>S</b>       | 152               | 0.62            | 0.28          | S              |
| <b>Mn</b>      | 206               | 2.94            | 0.77          | Mn             |
| <b>Total</b>   |                   | 100.00          | 100.00        |                |

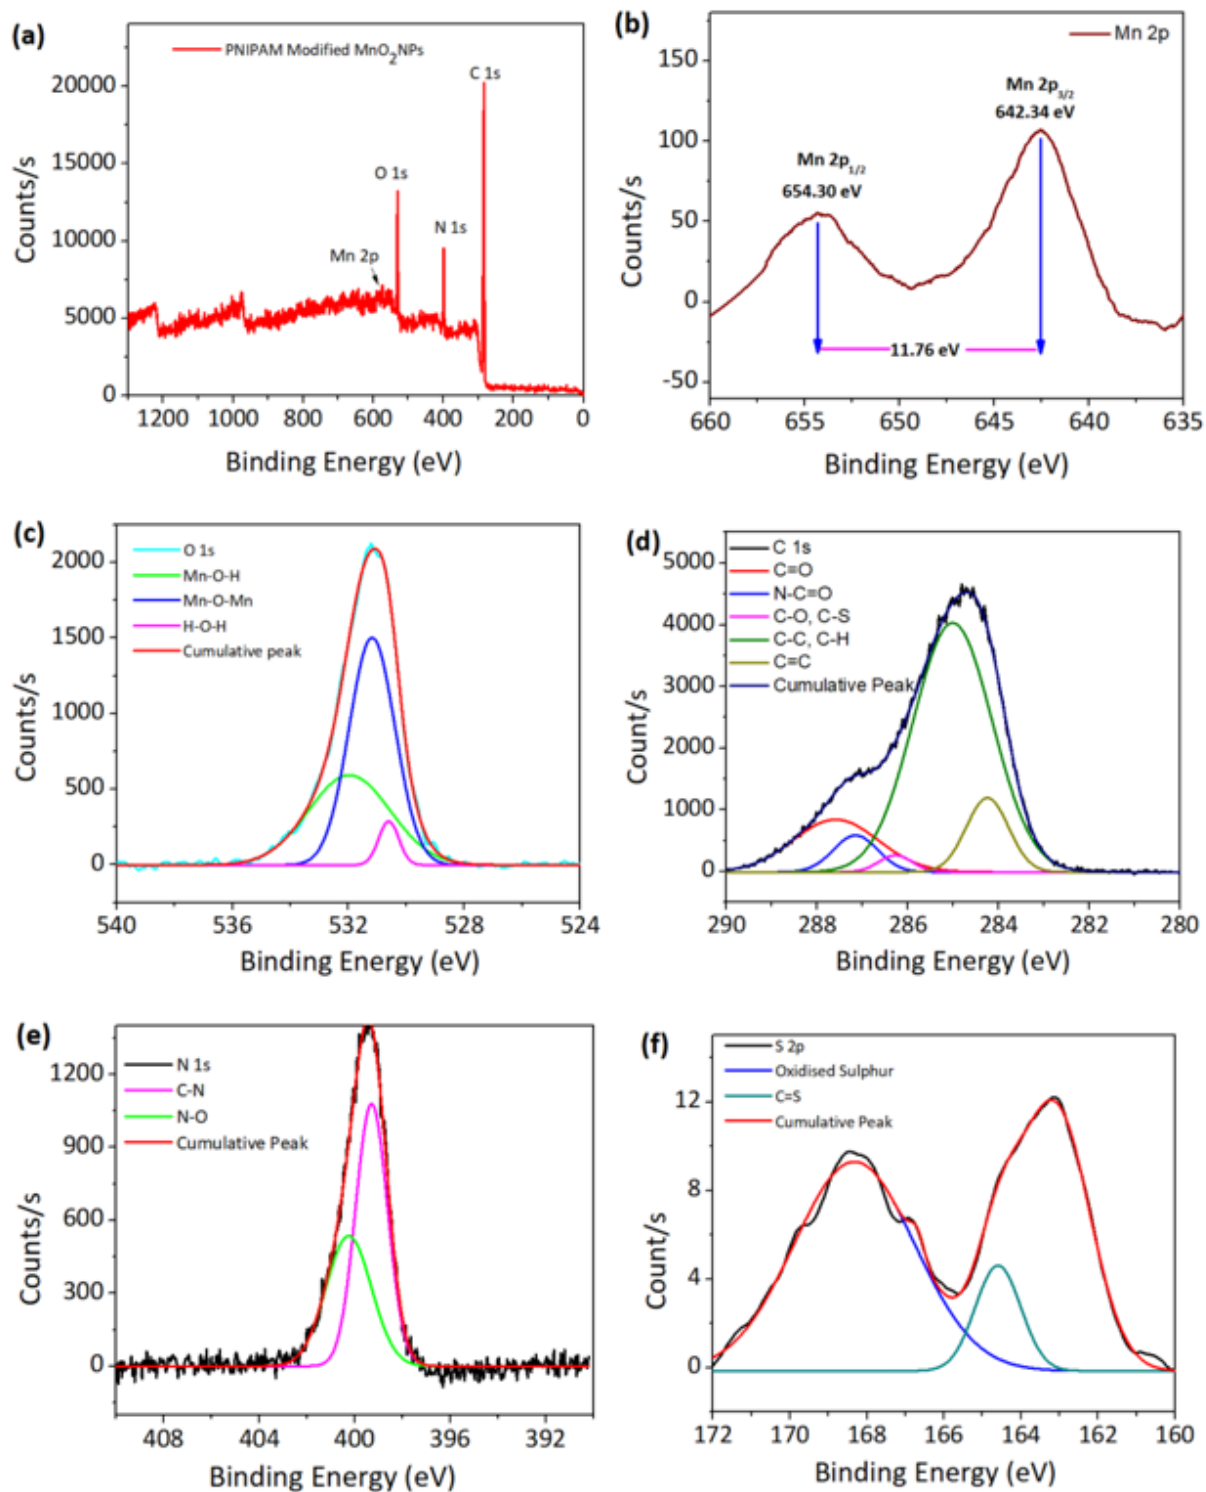

**Figure S8.** XPS-spectra (a) Overall PNIPAM@MnO<sub>2</sub>NPs, (b) Mn 2p,(c) O 1s, (d) C1s, (e) N 1s and (f) S 2p orbitals.

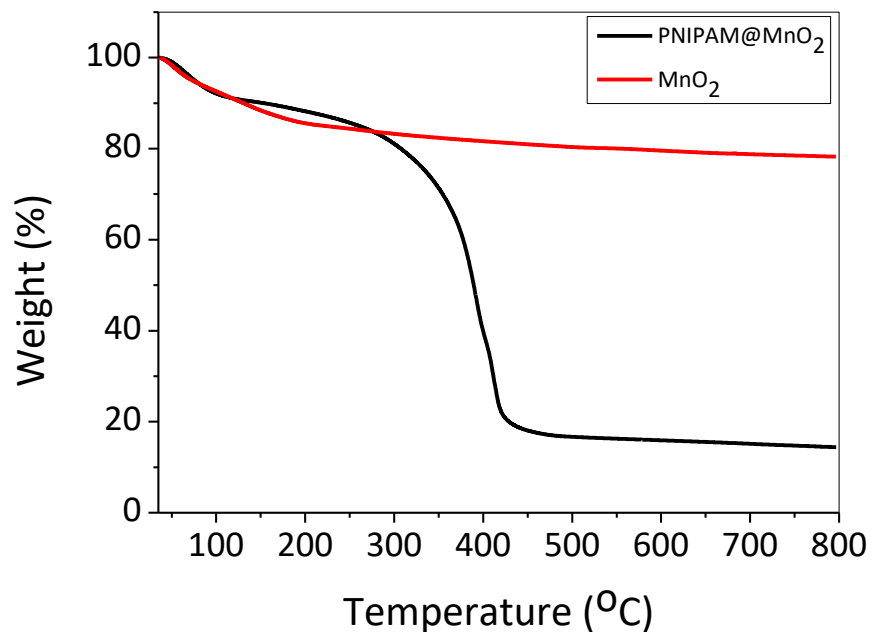

**Figure S9.** TGA graph for MnO<sub>2</sub>NPs and PNIPAM@MnO<sub>2</sub>NPs.

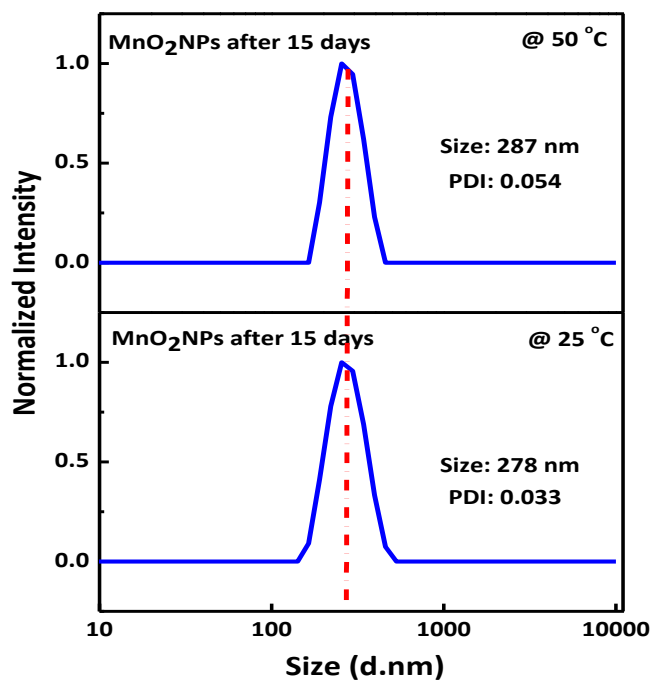

**Figure S10.** Stability of the MnO<sub>2</sub>NPs measured *via* DLS at 0.2 mg/mL concentration in water.



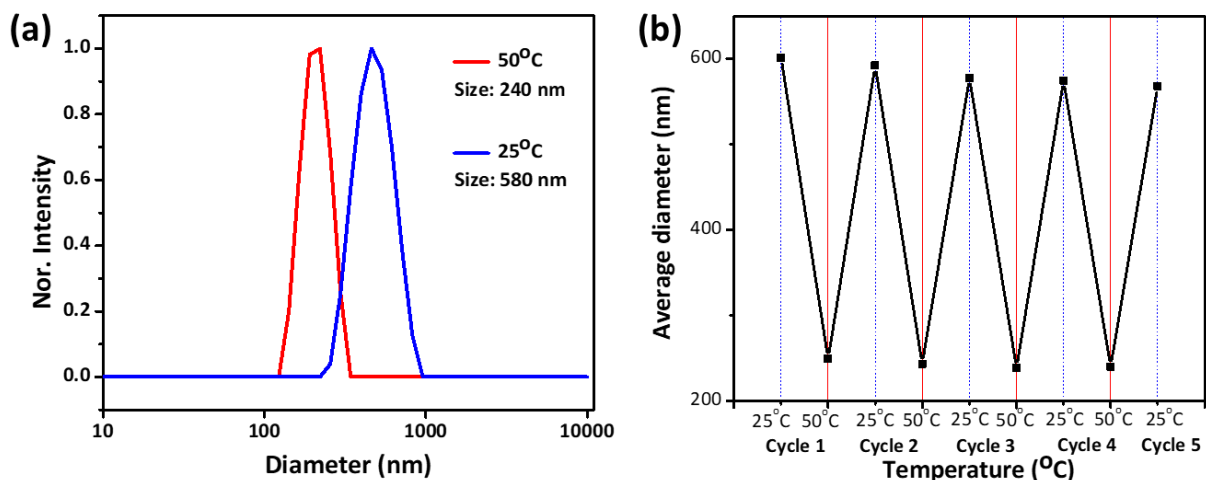

**Figure S11.** (a) DLS data for PNIPAM@MnO<sub>2</sub>NPs 25 °C and 50 °C, (b) reversible DLS measurement at 25 °C and 50 °C for 5 consecutive cycles at 0.1 mg/mL concentration in water.

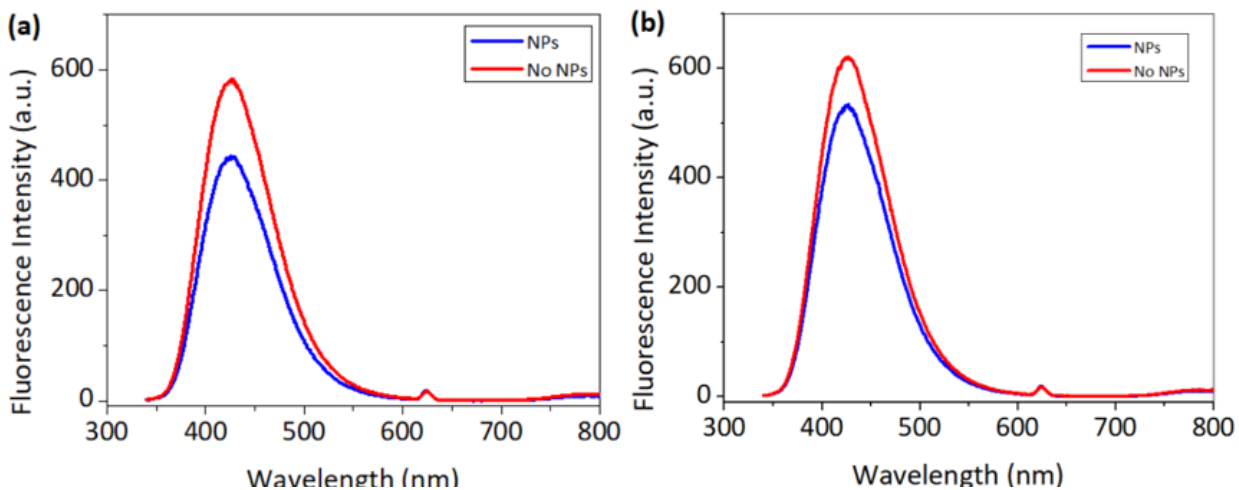

**Figure S12.** Comparison of fluorescent intensity without and with 10  $\mu$ L PNIPAM@MnO<sub>2</sub>NPs after 5 min in presence of 50  $\mu$ L HRP, 50  $\mu$ L HVA and 50  $\mu$ L H<sub>2</sub>O<sub>2</sub> in 2340  $\mu$ L PBS at two different temperatures (a) 10 °C and (b) 50 °C respectively ( $\lambda_{\text{Ex.}} = 312$  nm).

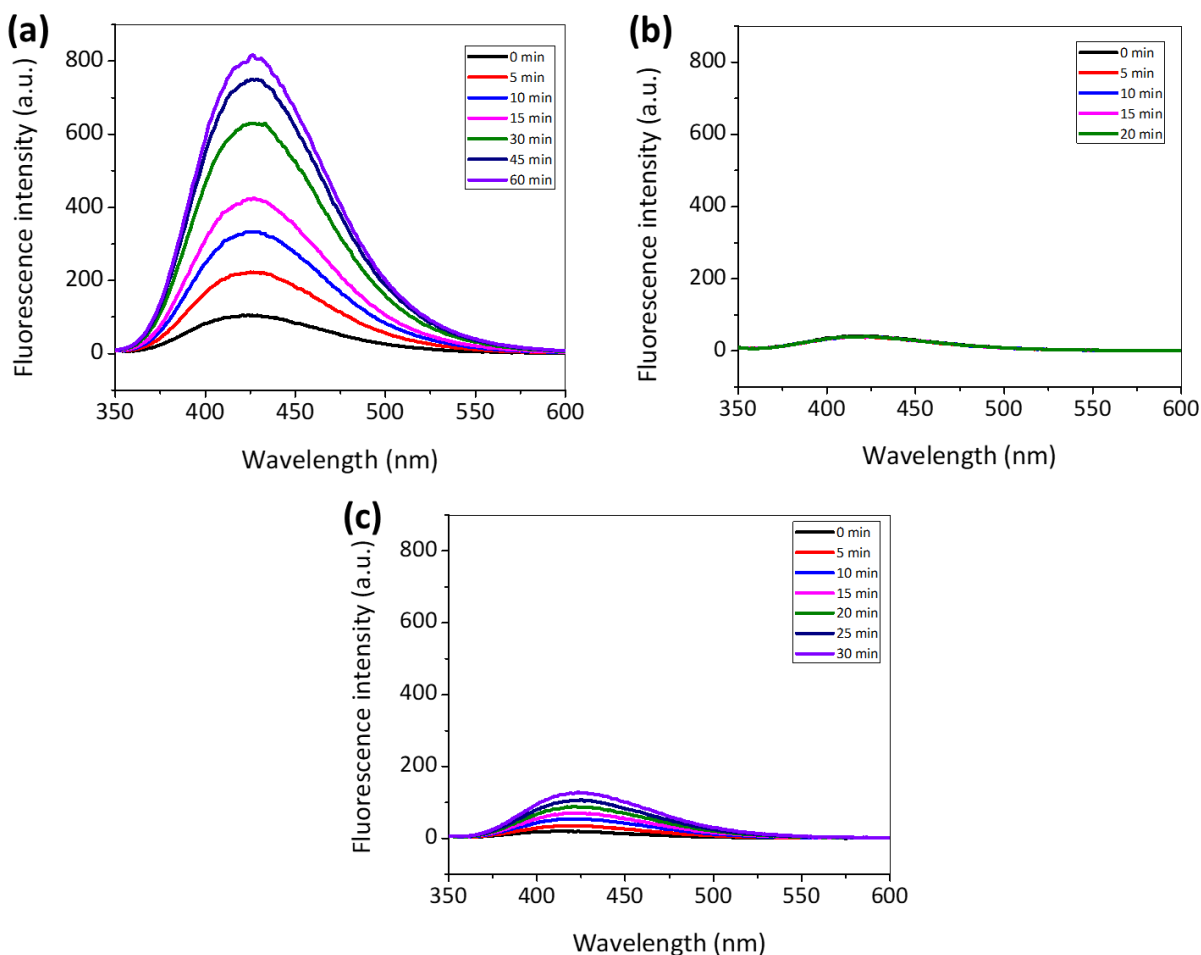

**Figure S13.** Fluorescence intensity (a) in presence of 50  $\mu\text{L}$  HRP, 100  $\mu\text{L}$  HVA and 50  $\mu\text{L}$   $\text{H}_2\text{O}_2$  in 2300  $\mu\text{L}$  PBS without PNIPAM@ $\text{MnO}_2$ NPs; (b) 10  $\mu\text{L}$  PNIPAM@ $\text{MnO}_2$ NPs in presence of 50  $\mu\text{L}$  HRP and 100  $\mu\text{L}$  HVA and 2340  $\mu\text{L}$  PBS without  $\text{H}_2\text{O}_2$ ; (c) 10  $\mu\text{L}$  PNIPAM@ $\text{MnO}_2$ NPs in presence of 50  $\mu\text{L}$  HVA and 50  $\mu\text{L}$   $\text{H}_2\text{O}_2$  in 2390  $\mu\text{L}$  PBS without HRP at 37°C in PBS ( $\lambda_{\text{Ex}} = 312 \text{ nm}$ ).

As reference experiments, the fluorescence intensity of the non-fluorescent HVA dye in PBS was measured in time in the absence of PNIPAM@ $\text{MnO}_2$ NPs,  $\text{H}_2\text{O}_2$ , and HRP respectively (Figures S13a-c) was measured. It is evident from comparing the three spectra that  $\text{H}_2\text{O}_2$  is essential for fluorescence enhancement and, thus, formation of the HVA dimer, as there is no increase in fluorescence without  $\text{H}_2\text{O}_2$ . In the absence of either the NPs or HRP the fluorescence increased in time. However, without HRP, the fluorescence intensity increase was 5 times lower than without the presence of PNIPAM@ $\text{MnO}_2$ NPs indicating the importance of HRP to catalyse the HVA dimerization.

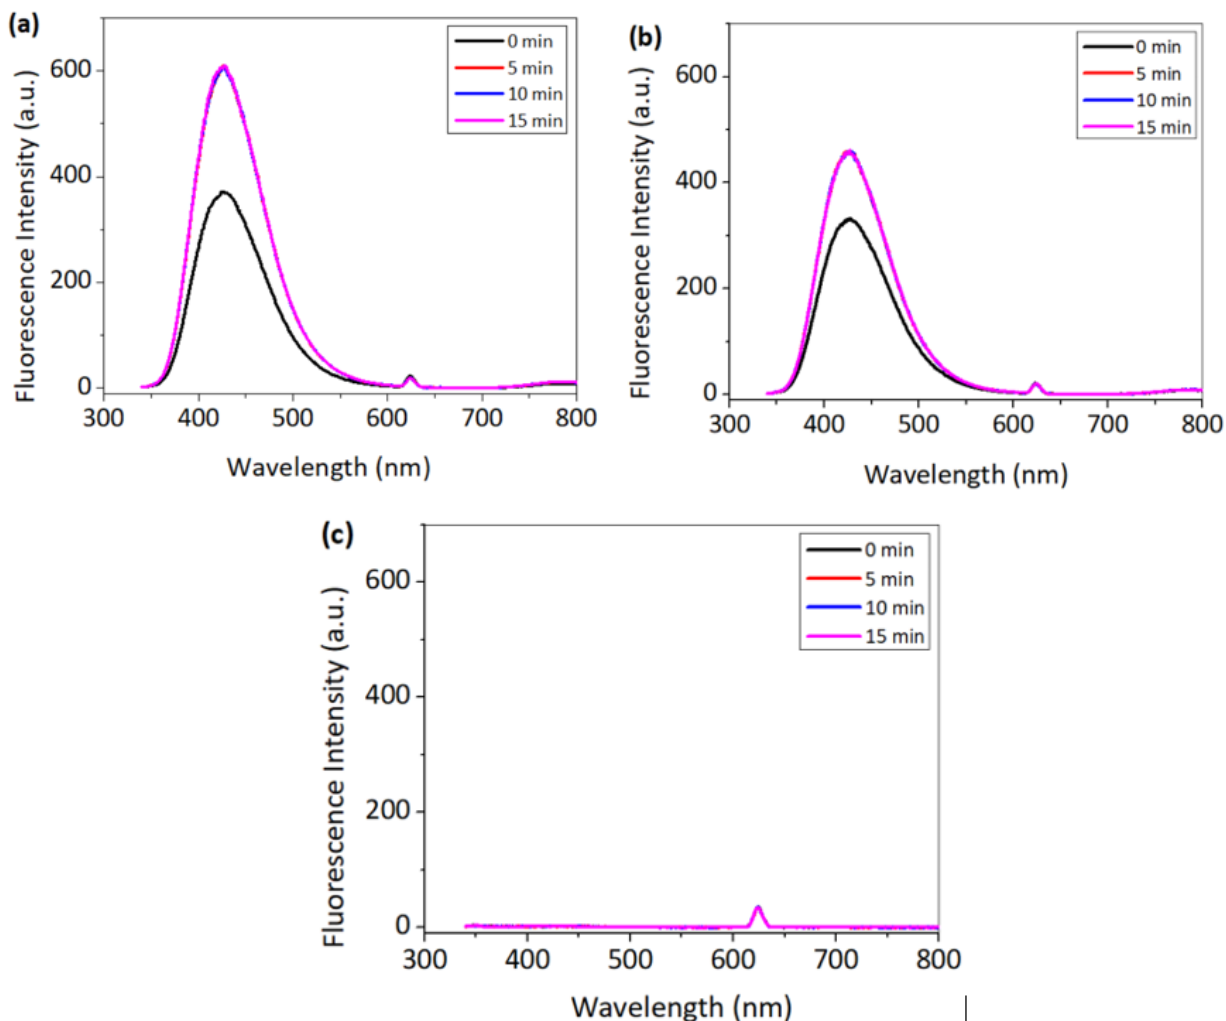

**Figure S14.** Fluorescence intensity in presence of (a) 50  $\mu\text{L}$  HRP solution, 100  $\mu\text{L}$  HVA, 2300  $\mu\text{L}$  PBS and 50  $\mu\text{L}$   $\text{H}_2\text{O}_2$  (b) 50  $\mu\text{L}$  HRP solution, 100  $\mu\text{L}$  HVA, 2325  $\mu\text{L}$  PBS and 25  $\mu\text{L}$   $\text{H}_2\text{O}_2$  and (c) 50  $\mu\text{L}$  HRP solution, 100  $\mu\text{L}$  HVA, 2350  $\mu\text{L}$  PBS and 0  $\mu\text{L}$   $\text{H}_2\text{O}_2$  at 37  $^\circ\text{C}$  ( $\lambda_{\text{Ex.}} = 312 \text{ nm}$ ).

To confirm the importance of  $\text{H}_2\text{O}_2$  for oxidation of HVA in presence of HRP, two experiments were performed. In one experiment, 50  $\mu\text{L}$  HRP solution, 100  $\mu\text{L}$  HVA, 2300  $\mu\text{L}$  PBS and 50  $\mu\text{L}$   $\text{H}_2\text{O}_2$  were added in cuvette and measurement was done at 37  $^\circ\text{C}$ . As anticipated, a clear fluorescent signal is visible around 420 nm due to dimer formation. After 5 min the intensity reaches its maximum and no further change occurs after 10 or 15 min (at 0 min  $\text{H}_2\text{O}_2$  was already present which is why a fluorescent signal is already noticeable) (Figure S14a). A decrease in  $\lambda_{\text{em,max}}$  of 149 a.u. was observed by changing the  $\text{H}_2\text{O}_2$  concentration from 50 mM to 25 mM (Figure S14b). In contrast when the same experiment was done without adding  $\text{H}_2\text{O}_2$  no fluorescence signal is observable (Figure S14c). These results indicate that HRP can only oxidize HVA when  $\text{H}_2\text{O}_2$  is present.
